# Supplementary material for: Multifunctional Tannic Acid-Alendronate Nanocomplexes with Antioxidant, Anti-Inflammatory, and Osteogenic Potency
Source: MDPI journal article supplement (doi:10.3390/nano11071812), 2021-07-13
Supplement: s1 [file s1]

## Supplementary Materials

# Multifunctional Tannic Acid-Alendronate Nanocomplexes with Antioxidant, Anti-Inflammatory, and Osteogenic Potency

Somang Choi <sup>1</sup>, Han-Saem Jo <sup>1</sup>, Heegyeong Song <sup>2</sup>, Hak-Jun Kim <sup>1</sup>, Jong-Keon Oh <sup>1</sup>, Jae-Woo Cho <sup>1,\*</sup>, Kyeongsoon Park <sup>2,\*</sup> and Sung-Eun Kim <sup>1,\*</sup>

<sup>1</sup> Department of Orthopedic Surgery and Nano-Based Disease Control Institute, Korea University Guro Hospital, #148, Gurodong-ro, Guro-gu, Seoul 08308, Republic of Korea; chlthakd1029@naver.com (S.C.); luchiatkfkd@naver.com (H.-S.J.); dakjul@korea.ac.kr (H.-J.K.); jkoh@korea.ac.kr (J.-K.O.)

<sup>2</sup> Department of Systems Biotechnology, Chung-Ang University, Anseong 17546, Korea; island6231@gmail.com

\* Correspondence: jaewoocho@korea.ac.kr (J.-W.C.); kspark1223@cau.ac.kr (K.P.); sekim10@korea.ac.kr (S.-E.K.); Tel.: +82-2-2626-1869 (J.-W.C.); +82-31-670-3357 (K.P.); +82-2-6738-4514 (S.-E.K.)

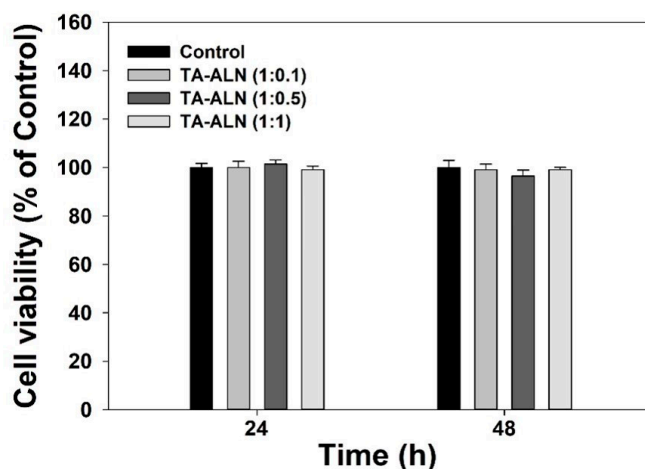

**Figure S1.** Outcome of cytotoxicity test of TA-ALN (1:0.1), TA-ALN (1:0.5) and TA-ALN (1:1) on MC3T3-E1 cells 24 and 48 h (n = 4 per group).

**Table S1.** Real-time PCR primer sequences for genes connected to the pro-inflammatory mediators

| Gene          | Primer (forward)              | Primer (reverse)               |
|---------------|-------------------------------|--------------------------------|
| COX-2         | TAT CAG GTC ATC GGT GGA GA    | CGA AGC CAG ATG GTA GCA TA     |
| IL-6          | TAC CAC TTC ACA AGT CGG AGG C | CTG CAA GTG CAT CAT CGT TGT TC |
| MMP-3         | CTC TGG AAC CTG AGA CAT CAC C | AGG AGT CCT GAG AGA TTT GCG C  |
| TNF- $\alpha$ | GGT GCC TAT GTC TCA GCC TCT T | GCC ATA GAA CTG ATG AGA GGG AG |

**Table S2.** Real-time PCR primer sequences for genes related to the osteogenesis factors

| Gene   | Primer (forward)              | Primer (reverse)              |
|--------|-------------------------------|-------------------------------|
| OCN    | GCT GCT ACT GTG GAA GAG AAG G | CCA CAG ATG ACT GAG AAC GCC T |
| COL1A1 | CAA GAG TGG TGA TCG TGG TG    | GCC TGT CTC ACC CTT GTC A     |
